# Supplementary material
Source: PubMed Central journal article supplement (PMC5452012)
Supplement: EMBJ-36-1528-s001.pdf [file EMBJ-36-1528-s001.pdf]

## Expanded View Figures

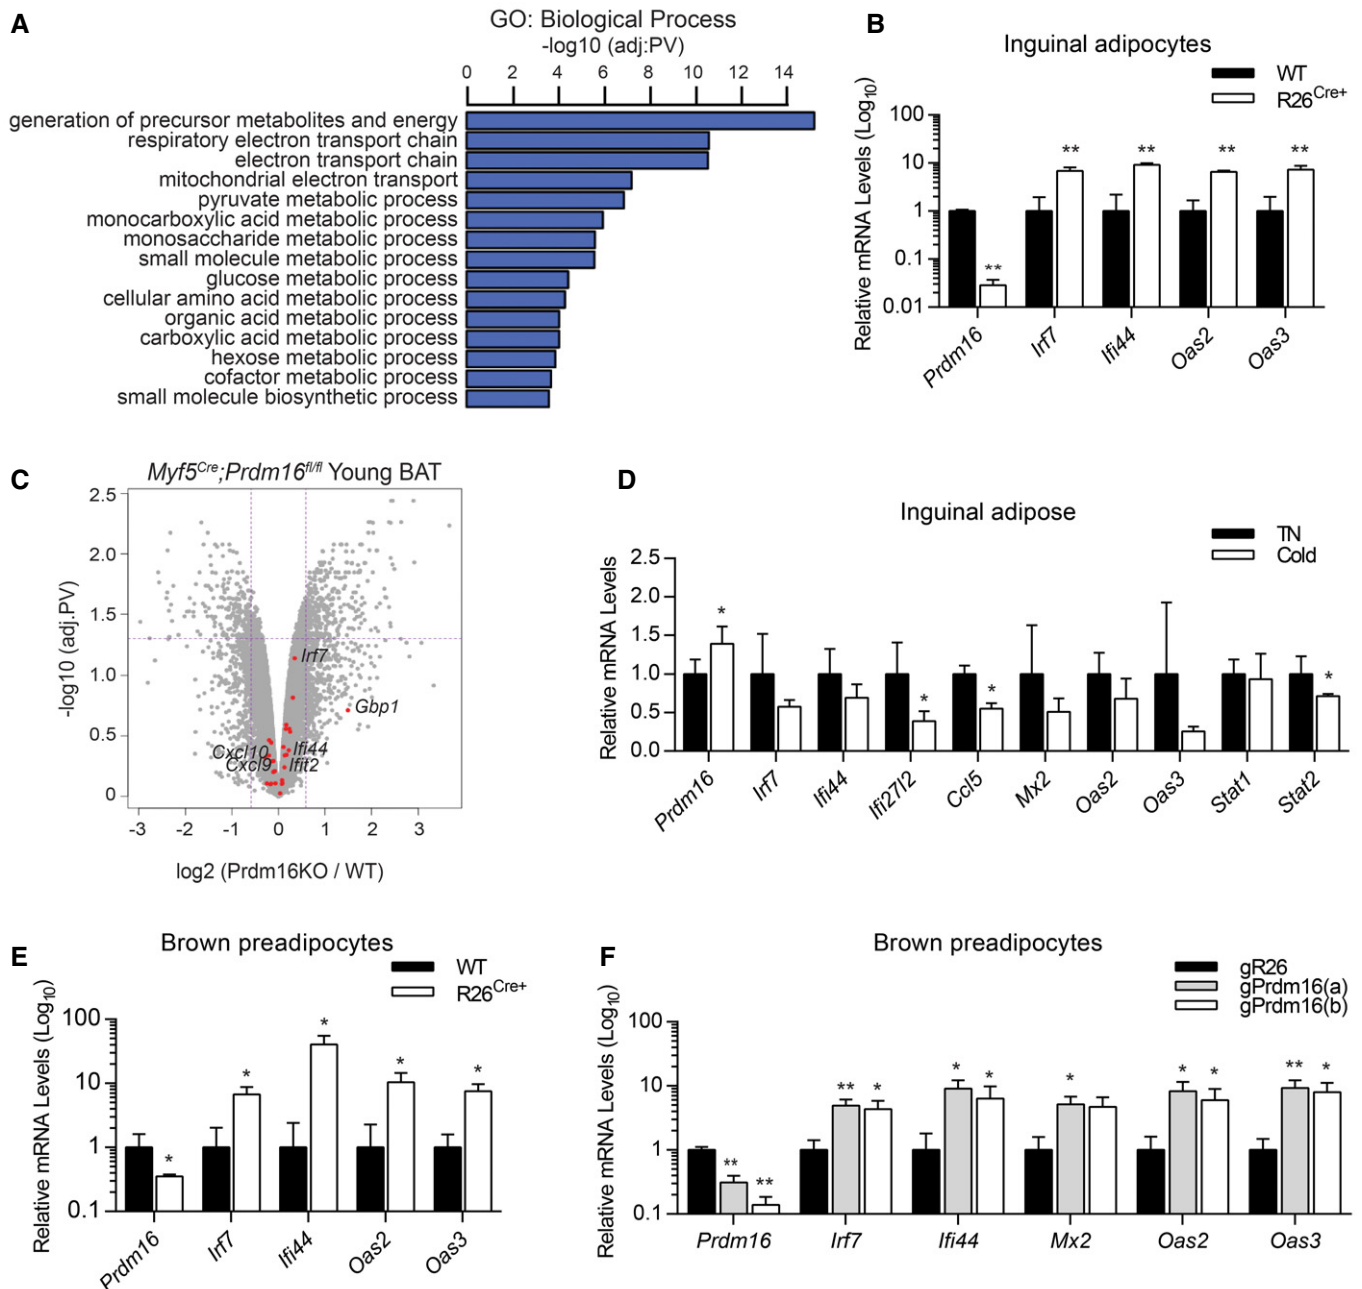

**Figure EV1. PRDM16 is required for repression of interferon-stimulated genes.**

A Gene ontology (GO) of downregulated genes in *Prdm16* KO cells (green cluster Fig 1B).

B Relative mRNA levels of *Prdm16* and ISGs in *Prdm16*<sup>fl/fl</sup> (WT) and *R26*<sup>CreER</sup>; *Prdm16*<sup>fl/fl</sup> (*R26*<sup>Cre+</sup>) inguinal adipocytes treated with 1  $\mu$ M 4-hydroxytamoxifen (4OHT).

C Volcano plot comparing gene expression between young *Prdm16*<sup>fl/fl</sup> (WT) and *Prdm16* KO BAT. Red dots indicate type I ISGs found in the blue cluster of Fig 1B heat map.

D Relative mRNA levels of *Prdm16* and ISGs in inguinal adipose from wild-type mice incubated in TN ( $n = 5$ ) or cold ( $n = 5$ ).

E Relative mRNA levels of *Prdm16* and ISGs in WT ( $n = 7$ ) and *R26*<sup>Cre+</sup> ( $n = 13$ ) brown preadipose cells treated with 4OHT.

F Relative mRNA of *Prdm16* and ISGs in brown adipocyte precursor cells transduced with CRISPR lentiviral vectors expressing Cas9 and guide RNA sequences for *Rosa26* (gR26) or *Prdm16* (gPrdm16a, gPrdm16b) ( $n = 3$ ).

Data information: Data are presented as mean  $\pm$  standard deviation (B, E, F) and mean  $\pm$  SEM (D). \* $P \leq 0.05$ , \*\* $P \leq 0.01$  (Student's *t*-test).

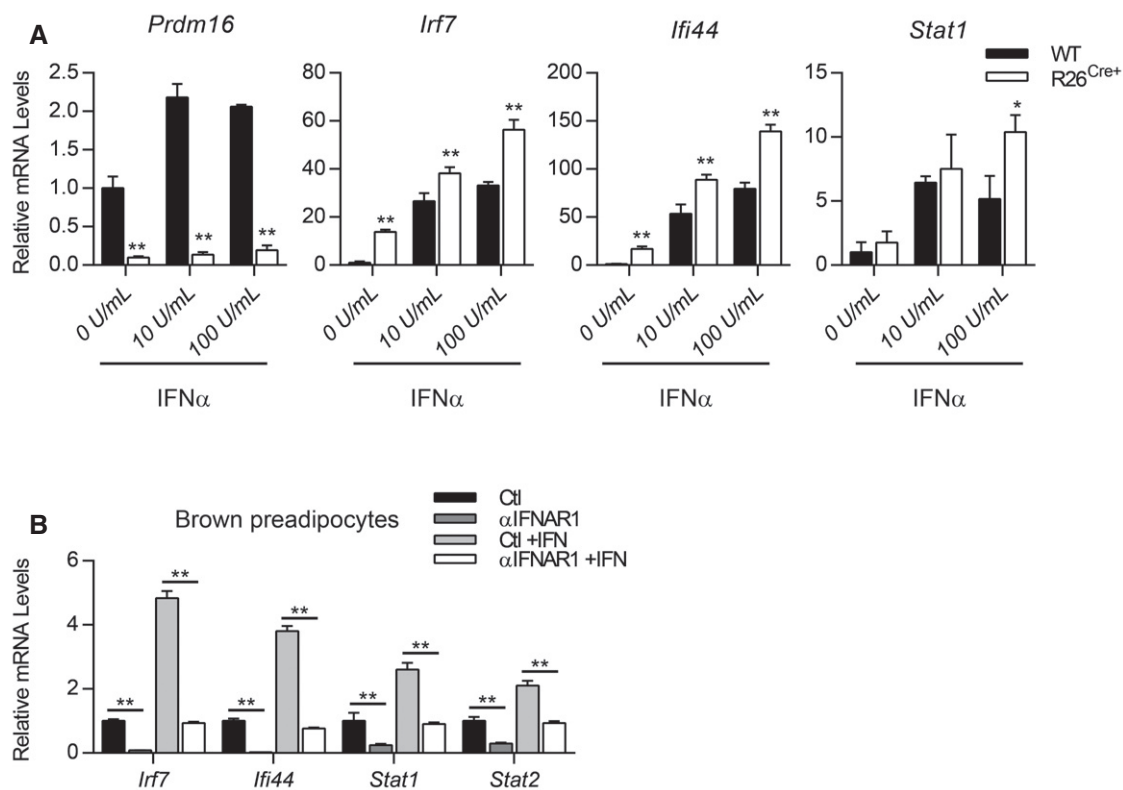

**Figure EV2. PRDM16 blocks type I IFN signaling downstream of IFNAR receptor.**

A Relative mRNA levels of *Prdm16*, *Irf7*, *Ifi44*, and *Stat1* in WT and R26<sup>Cre+</sup> inguinal precursors treated with increasing doses of recombinant mouse IFN $\alpha$ .

B Relative mRNA levels of ISGs in brown preadipocytes treated with vehicle, anti-IFNAR ( $\alpha$ IFNAR) neutralizing antibody, mouse IFN $\alpha$ , or a combination of  $\alpha$ IFNAR and IFN $\alpha$ .

Data information: Data represent ( $n = 3$ ) mean  $\pm$  standard deviation. \* $P \leq 0.05$ , \*\* $P \leq 0.01$  (Student's  $t$ -test).

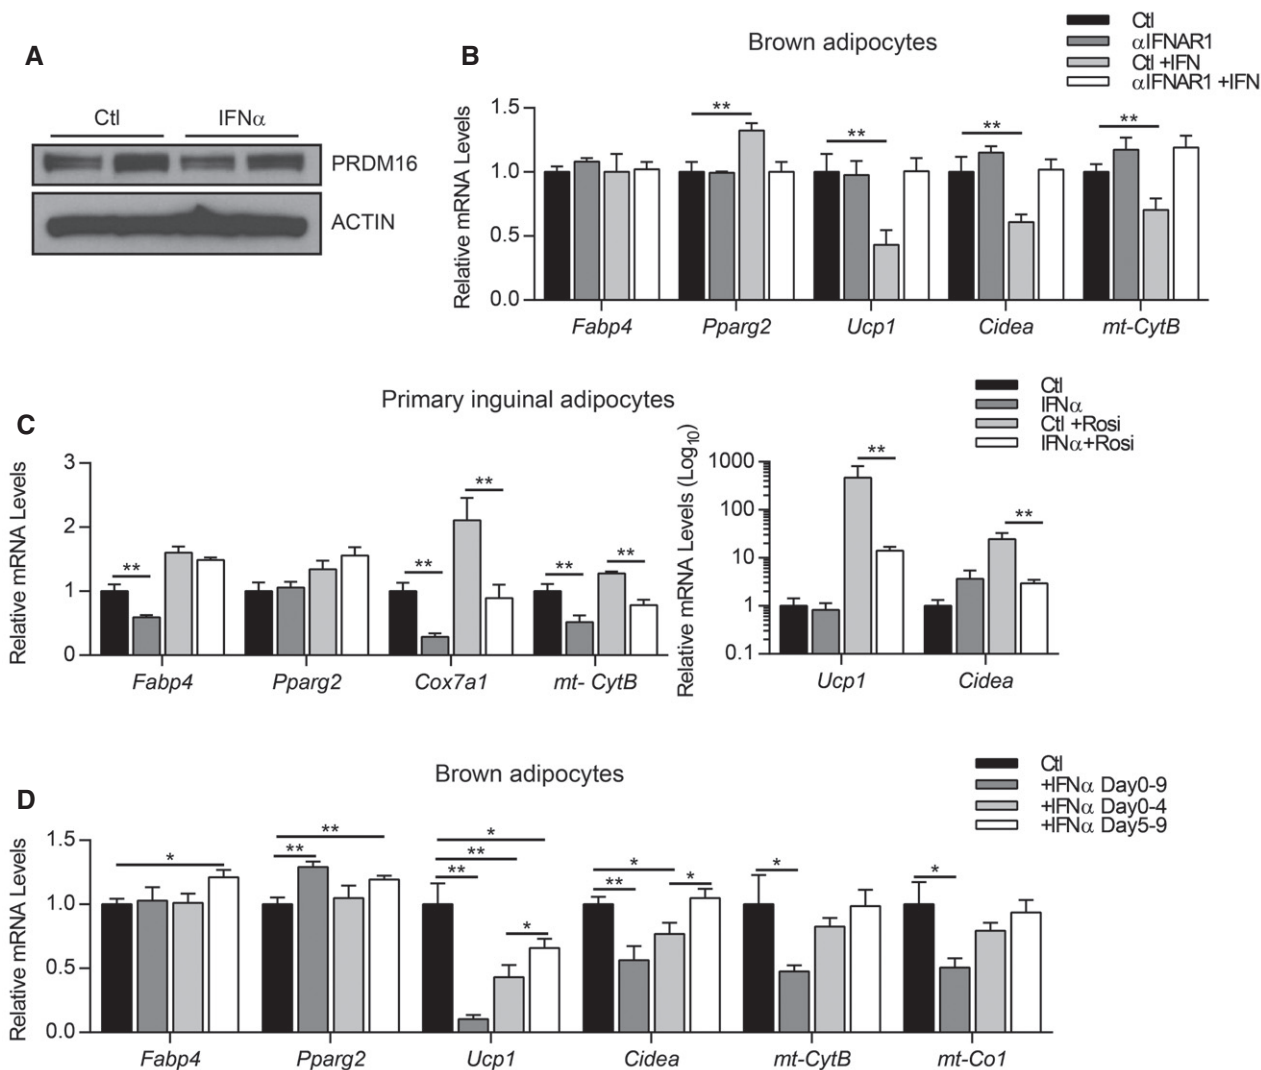

**Figure EV3. Type I IFN disrupts mitochondrial structure and function in adipocytes.**

A, B Western blot analysis of PRDM16 and actin protein (A) and relative mRNA levels of pan-adipogenic genes (*Fabp4*, *Pparg2*) and brown-selective genes (*Ucp1*, *Cidea*) (B) in brown adipocytes treated with vehicle, anti-IFNAR ( $\alpha$ IFNAR) neutralizing antibody, mouse IFN $\alpha$ , or  $\alpha$ IFNAR + IFN $\alpha$ .

C Relative mRNA levels of general adipocyte markers (*Fabp4*, *Pparg2*), mitochondrial genes (*Cox7a1*, *mt-Cytb*), and brown fat-selective genes (*Ucp1*, *Cidea*) in primary inguinal adipocytes treated with IFN $\alpha$  or vehicle (Ctl) +/- 1  $\mu$ M rosiglitazone (Rosi).

D Relative mRNA levels of general adipocyte markers (*Fabp4*, *Pparg2*), brown fat-selective genes (*Ucp1*, *Cidea*), and mitochondrial genes (*mt-Cytb*, *mt-Co1*) in brown adipocytes treated with vehicle (Ctl) or mouse IFN $\alpha$  for varying periods during differentiation.

Data information: Data represent ( $n = 3$ ) mean  $\pm$  standard deviation. \* $P \leq 0.05$ , \*\* $P \leq 0.01$  (Student's  $t$ -test).

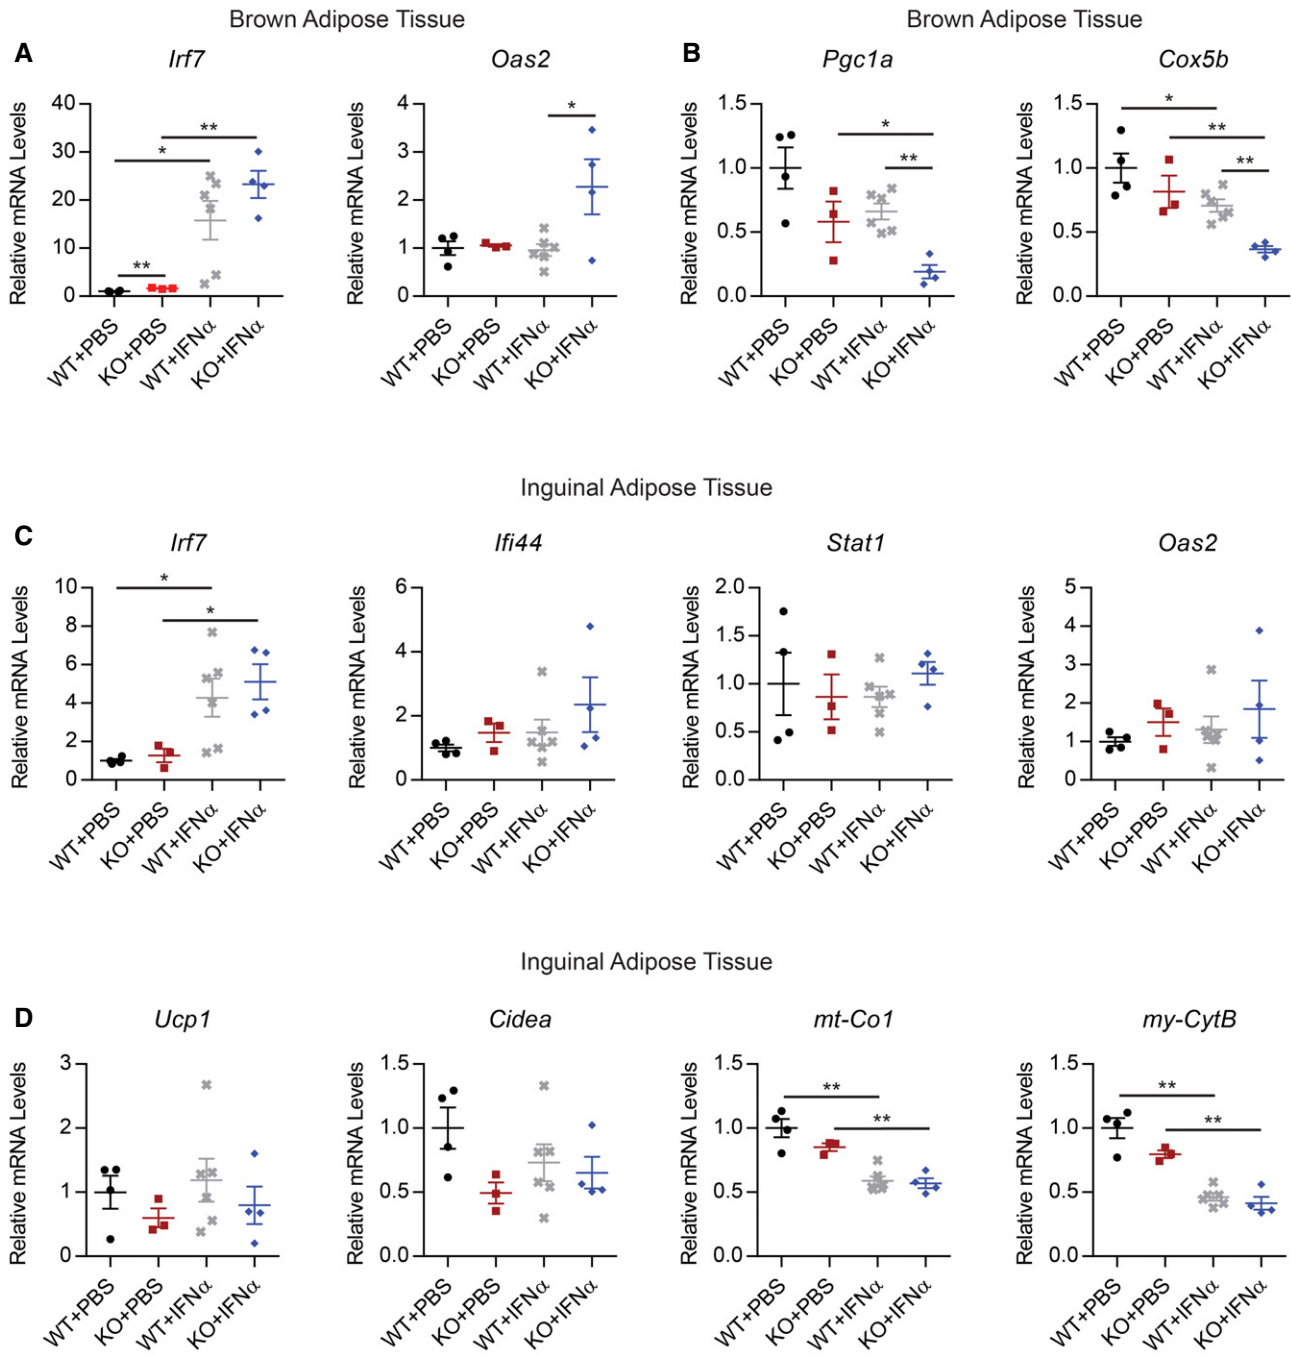

**Figure EV4. PRDM16 opposes type I IFN signaling *in vivo*.**

A, B Relative mRNA levels of ISGs (A) and mitochondrial genes (B) in brown adipose of *Prdm16<sup>fl/fl</sup>* (WT) and *Myf5<sup>Cre</sup>; Prdm16<sup>fl/fl</sup>* (KO) mice treated with IFN $\alpha$  or phosphate-buffered saline (PBS) for 2 weeks.

C, D Relative mRNA levels of ISGs (C), as well as brown fat-selective genes (*Ucp1*, *Cidea*) and mitochondrial genes (*mt-Co1*, *mt-CytB*) (D) in inguinal tissue from the same experimental mice in (A, B).

Data information: Experimental groups: WT+PBS ( $n = 4$ ), KO+PBS ( $n = 3$ ), WT+IFN ( $n = 6$ ), KO+IFN ( $n = 4$ ). Data are presented as mean  $\pm$  SEM. \* $P \leq 0.05$ , \*\* $P \leq 0.01$  (paired two-way ANOVA).

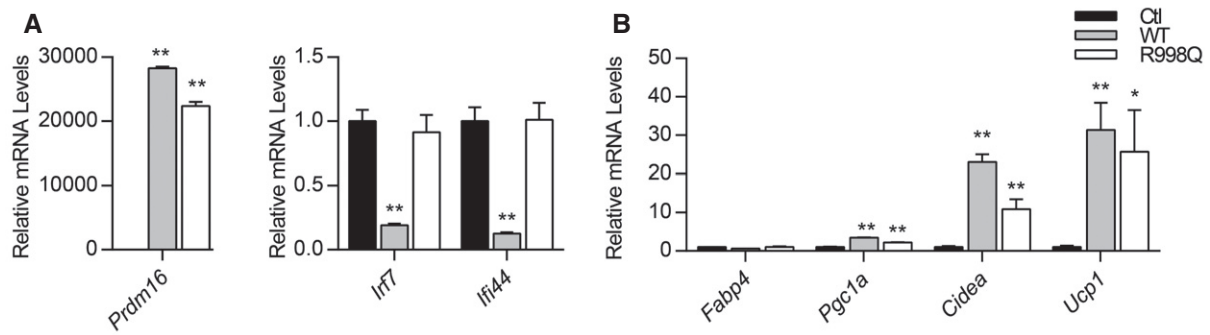

**Figure EV5. PRDM16 represses ISGs through direct binding at gene promoters.**

A, B Relative mRNA levels of *Prdm16* and ISGs (A) and relative mRNA levels of adipogenic (*Fabp4*) and brown fat-selective genes (*Pgc1a*, *Cidea*, *Ucp1*) in *Prdm16* KO brown adipocytes cells transduced with retroviral vectors expressing wild-type (WT) or DNA-binding mutant (R998Q) PRDM16, or empty vector (Ctl).

Data information: Data represent ( $n = 3$ ) mean  $\pm$  standard deviation. \* $P \leq 0.05$ , \*\* $P \leq 0.01$  (Student's *t*-test).

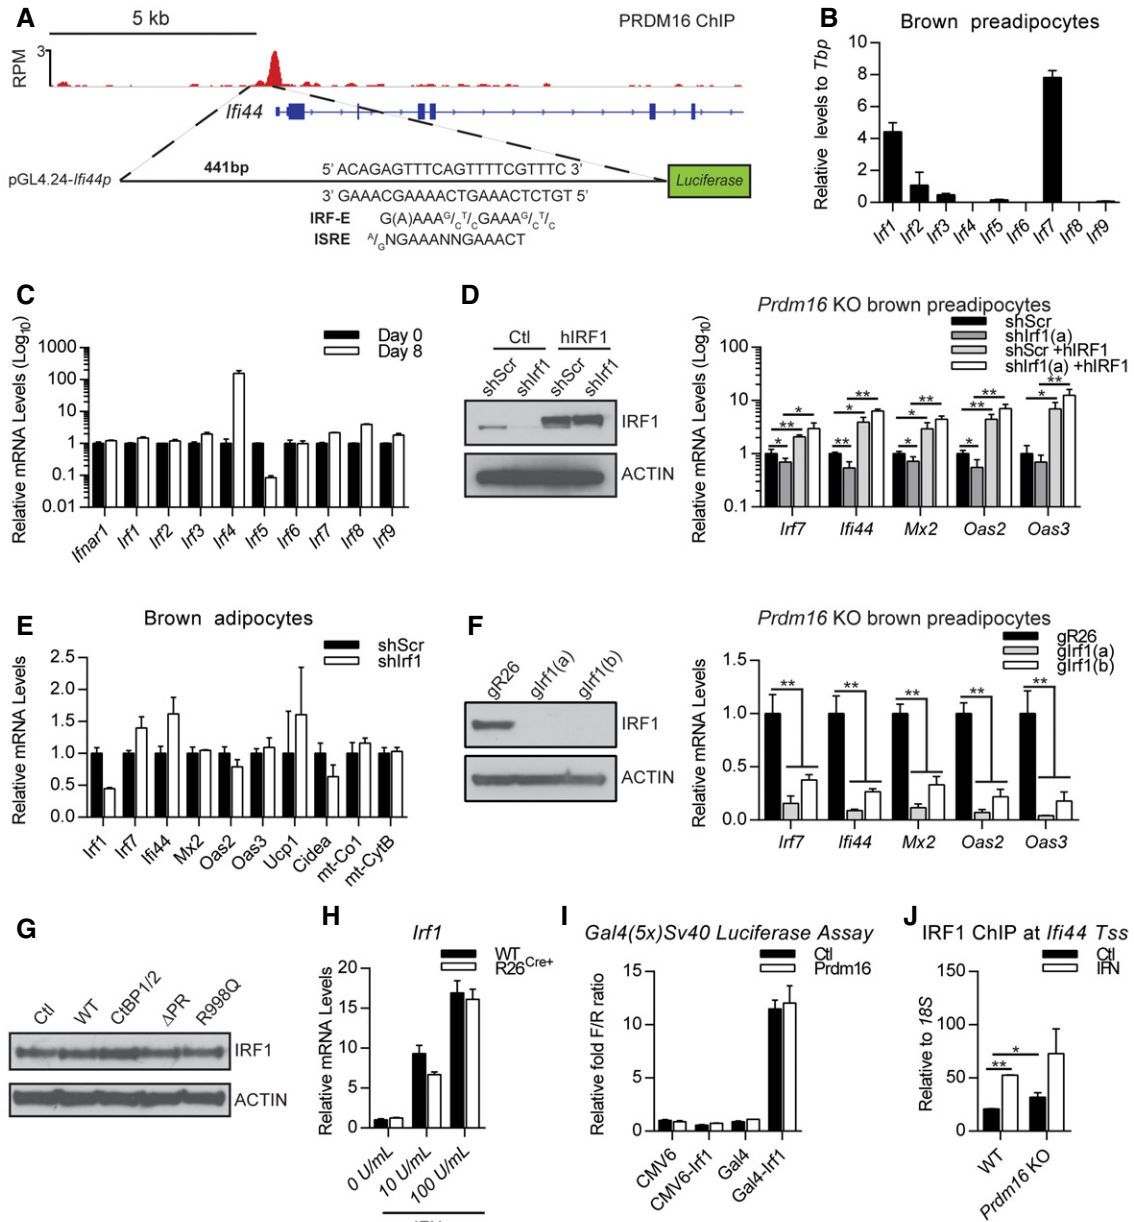

**Figure EV6. PRDM16 blocks IRF1 function at IRF-E elements.**

- A Schematic showing the ChIP-seq track of PRDM16 binding at *Ifi44* promoter and the identified IFN-stimulated response element (ISRE)/IRF-binding element (IRF-E) that was inserted into the luciferase reporter plasmid (pGL4.24-*Ifi44p*).
- B Relative mRNA levels of IRF genes in brown preadipose cells.
- C Relative mRNA levels of *Ifnar1* and *Irf*s in brown preadipocytes (D0) and mature brown adipocytes (D8).
- D Western blot analysis of IRF1 and actin protein levels and relative mRNA levels of ISGs in *Prdm16* KO brown adipocytes cells transduced with lentiviral short-hairpin RNA directed against *Irf1* (shIrf1) or a scrambled control (shScr) and either retroviral expression vectors expressing human IRF1 (hIRF1) or puromycin control (Ctl).
- E Relative mRNA levels of *Irf1* and ISGs and of brown fat-selective genes (*Ucp1*, *Cidea*) and mitochondrial genes (*mt-Co1*, *mt-Cytb*) in brown adipocytes transduced with lentiviral short-hairpin RNA directed against *Irf1* (shIrf1) or a scrambled control (shScr).
- F Western blot analysis of IRF1 and actin protein levels and relative mRNA levels of ISGs in *Prdm16* KO brown adipocytes cells transduced with CRISPR lentiviral vectors expressing Cas9 and guide RNA sequences for *Rosa26* (gR26) or *Irf1* (gIrf1a, gIrf1b).
- G Western blot analysis of IRF1 and actin (loading control) protein levels in cells from Fig 5C.
- H Relative mRNA levels of *Irf1* in *Prdm16*<sup>fl/fl</sup> (WT) and *R26*<sup>CreER</sup>; *Prdm16*<sup>fl/fl</sup> (*R26*<sup>Cre+</sup>) inguinal adipocytes treated 1  $\mu$ M 4OHT and increasing doses of IFN $\alpha$ .
- I Transcriptional activity of a Gal4 UAS-driven luciferase gene in response to expression of GAL4 DNA-binding domain alone (Gal4), IRF1, or GAL4-IRF1+/- PRDM16.
- J ChIP-qPCR showing IRF1 binding at *Ifi44* transcriptional start site (Tss) in WT and *Prdm16* KO cells +/- IFN $\alpha$ .

Data information: Data represent ( $n = 3$ ) mean  $\pm$  standard deviation (B–F, H, J) and ( $n = 3$ ) mean  $\pm$  SEM (I). \* $P < 0.05$ , \*\* $P < 0.01$  (Student's *t*-test).
