# Supplementary material
Source: PubMed Central journal article supplement (PMC5452012)

**B**

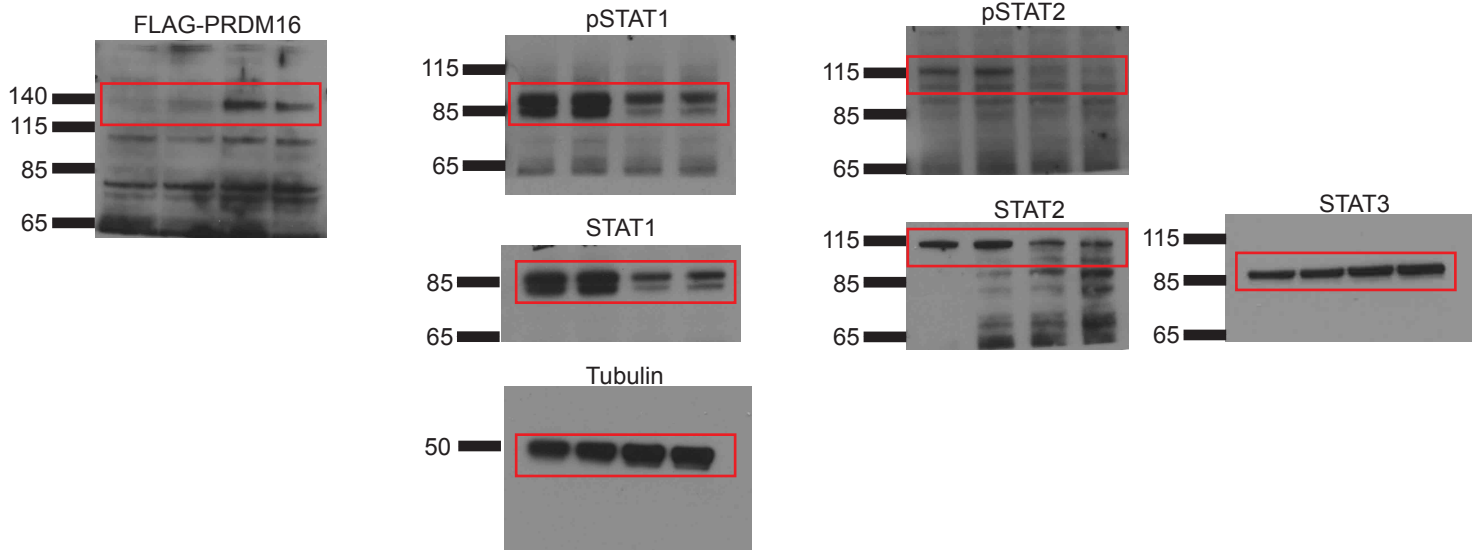

**E**

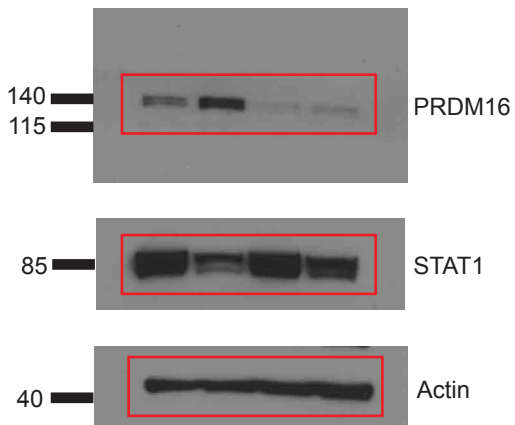

Supplement: EMBJ-36-1528-s002.pdf [file EMBJ-36-1528-s002.pdf]

C

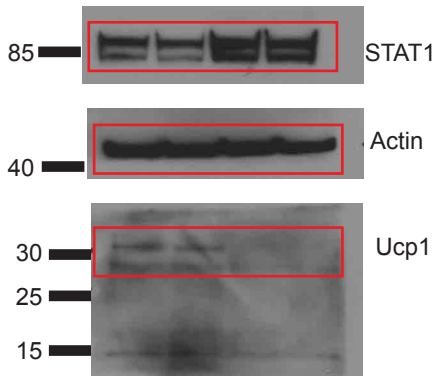

E

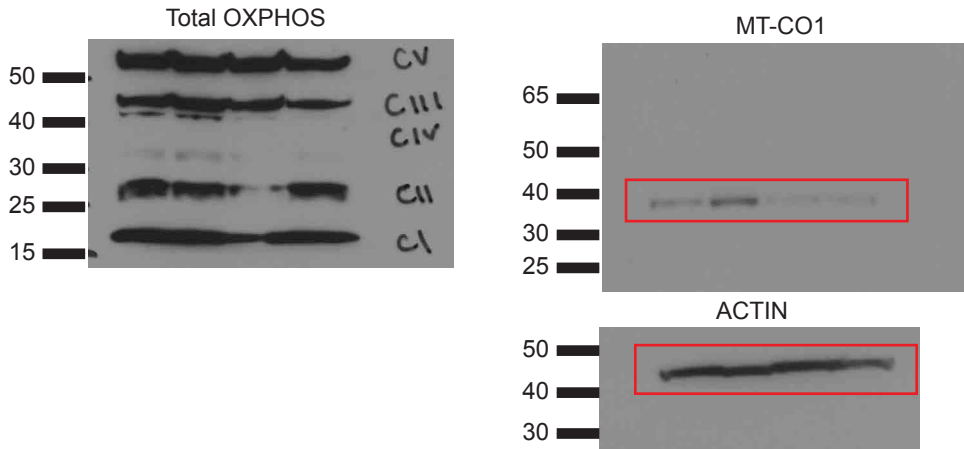

Supplement: EMBJ-36-1528-s003.pdf [file EMBJ-36-1528-s003.pdf]

**A**

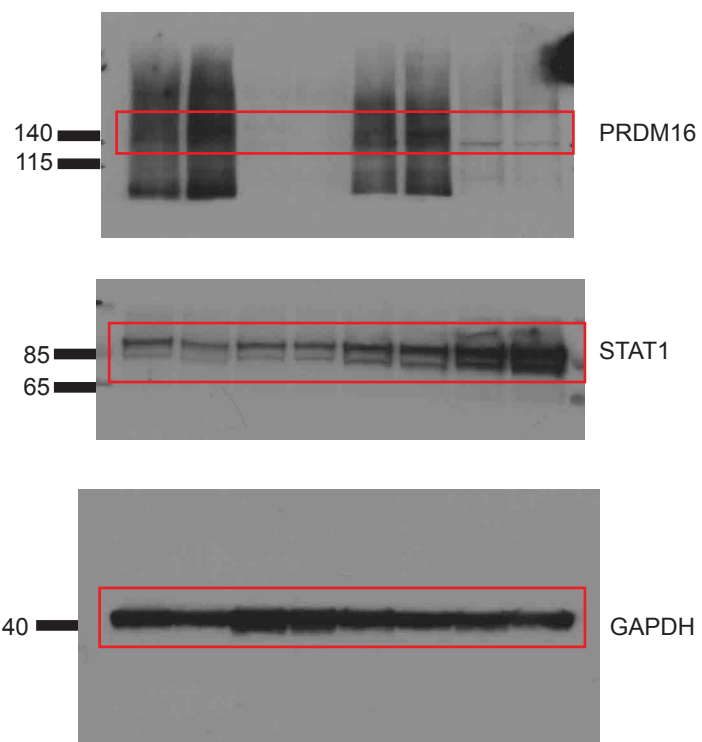

Supplement: EMBJ-36-1528-s004.pdf [file EMBJ-36-1528-s004.pdf]

**C**

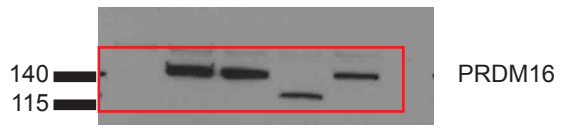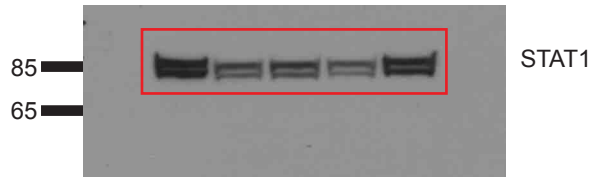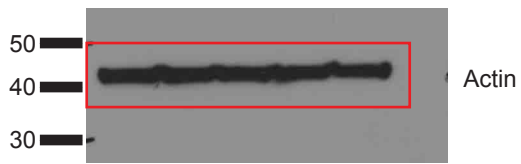

Supplement: EMBJ-36-1528-s005.pdf [file EMBJ-36-1528-s005.pdf]

**A**

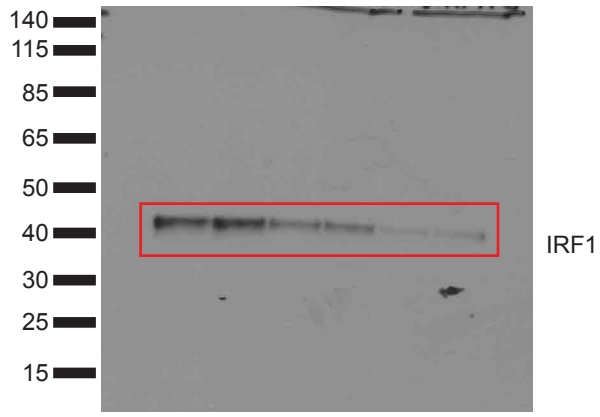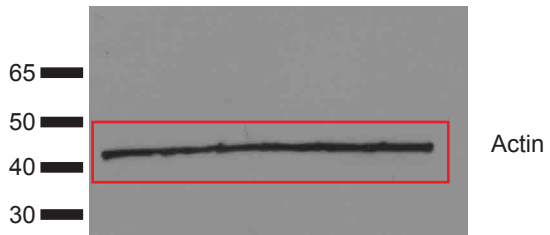

**C**

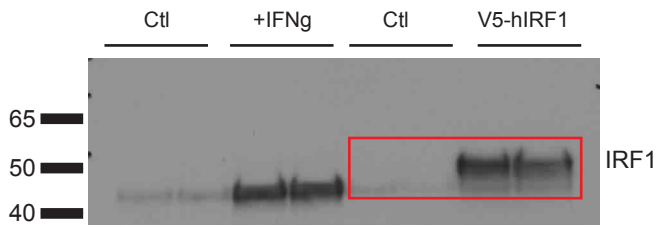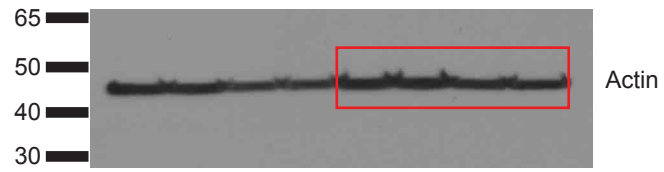

Supplement: EMBJ-36-1528-s006.pdf [file EMBJ-36-1528-s006.pdf]
